# Supplementary material for: Using Functional Signatures to Identify Repositioned Drugs for Breast, Myelogenous Leukemia and Prostate Cancer
Source: PLoS Comput Biol. 2012 Feb 9;8(2):e1002347. doi: 10.1371/journal.pcbi.1002347 (PMC3276504; doi:10.1371/journal.pcbi.1002347)
Supplement: Table S1 — Candidates for repositioning for three cancers. FDA approved compounds (*); Compounds showing duality (§); The 1st number in the bracket associated with each compound is the p-value, the 2nd number is the number of overlapping genes. (DOC) [file pcbi.1002347.s002.doc]

**Table S1.** Candidates for repositioning are shown with identical colors under different diseases. FDA approved compounds (*); Compounds showing duality (§); The 1st number in the bracket associated with each compound is the p-value, the 2nd number is the number of overlapping genes.

| Total **1309** compounds in CMAP, **913** (**510** are FDA approved drugs) used in this study | | | |
| --- | --- | --- | --- |
|  | Breast Cancer | Leukemia | Prostate Cancer |
| Results of UC/DB | | | |
| FDA drug in CMAP for target disease | Fulvestrant  Tamoxifen  Exemestane  Letrozole | Tretinoin  Pepstatin  Etoposide  Prednisone  Prednisolone | Diethylstilbestrol  Megestrol  Nilutamide |
| Predictions that are FDA drugs for other disease | Amiloride*(1e-3, 134)  Amoxicillin*(2e-3, 131)  Chlortetracycline*§(3e-3, 130)  Estradiol*(1e-3, 133)  Irinotecan*§(3e-4, 138)  Nilutamide*§(1e-5, 145)  Promethazine*(3e-3, 130)  Propranolol*(3e-3, 130)  Sirolimus*§(9e-3, 127)  Thioridazine*(1e-3, 132)  Troleandomycin*(6e-3, 128)  Valproic acid*§(4e-10, 163) | Alfuzosin*(2e-3, 43)  Alprostadil*(1e-3, 44)  Amikacin*(3e-9, 61)  Brinzolamide*§(3e-7, 56)  Chloroquine*(7e-3, 41)  Chlorphenamine*§(6e-9, 60)  Chlorpromazine*(4e-3, 42)  Ciprofloxacin*(4e-3, 42)  Diazoxide*(7e-4, 45)  Dihydroergotamine*(2e-3, 43)  Disulfiram*§(1e-5, 51)  Enoxacin*(2e-4, 47)  Estradiol*§(4e-11, 65)  Etodolac*(3e-4, 46)  Furosemide*(2e-5, 50)  Glipizide*(2e-4, 47)  Haloperidol*(2e-3, 43)  Isoniazid*(3e-6, 53 )  Ivermectin*(5e-5, 49)  Loxapine*(3e-6, 53)  Mefloquine*§(3e-7, 56)  Mepenzolate bromide*(7e-3, 41)  Methylergometrine*§ (7e-3, 41)  Metrizamide* (1e-3, 44)  Miconazole* (1e-4, 48)  Minocycline* (1e-4, 48)  Minoxidil* (4e-3, 42)  Mometasone* (1e-6, 54)  Nabumetone* (7e-4, 45)  Naltrexone* (3e-4, 46)  Nicardipine* (6e-7, 55)  Norfloxacin* (3e-6, 53)  Orciprenaline* (1e-3, 44)  Oxybuprocaine* (6e-6, 52)  Oxybutynin* (7e-3, 41)  Pergolide* (1e-3, 44)  Perphenazine* (3e-4, 46)  Phenindione* (7e-4, 45)  Pindolol* (4e-3, 42)  Pyridoxine* (1e-3, 44)  Streptomycin* (1e-6, 54)  Sulfadiazine* (1e-4, 48)  Tamoxifen* (3e-9, 61)  Thalidomide* (2e-4, 47)  Thioridazine*§ (7e-3, 41)  Ticlopidine* (5e-5, 49)  Tranexamic acid*§ (3e-7, 56) | Alprostadil*§(5e-3, 4104)  Beclometasone*§(4e-3, 4106)  Brompheniramine*§(1e-4, 4141)  Cefalotin*§(5e-3, 4104)  Chenodeoxycholic acid*§ (2e-3, 4113)  Chlormezanone*§(6e-3, 4102)  Chlortalidone*§(2e-4, 4132)  Danazol*§(1e-4, 4138)  Dapsone*§(2e-3, 4111)  Deferoxamine*§(1e-3, 4116)  Dihydroergotamine*§(7e-3, 4101)  Disopyramide*§(7e-3, 4100)  Disulfiram*§(6e-3, 4102)  Ethionamide*§(2e-3, 4113)  Flecainide*§(2e-3)  Fluvastatin*§(2e-4, 4134)  Guanabenz*§(1e-3, 4117)  Guanadrel*(9e-3, 4097)  Hydrocortisone*§(6e-5, 4146)  Isoniazid*§(2e-3, 4111)  Levocabastine*§(3e-3, 4109)  Lidocaine*§ (1e-4, 4137)  Memantine*§ (4e-3, 4105)  Metixene*§ (8e-3, 4099)  Mometasone*§ (4e-3, 4105)  Mycophenolic acid*§ (1e-3, 4119)  Naftifine*§ (7e-4, 4124)  Nicotinic acid*§ (2e-4, 4132)  Nifedipine*§ (2e-3, 4114)  Ondansetron*§ (4e-3, 4107)  Orphenadrine*§ (5e-3, 4104)  Oxyphenbutazone*§ (5e-3, 4104)  Paclitaxel*§ (1e-4, 4142)  Pergolide*§ (8e-3, 4099)  Perphenazine*§ (8e-4, 4123)  Pimozide*§ (3e-3, 4108)  Ribavirin*§ (4e-3, 4107)  Sirolimus*§ (1e-4, 4142)  Spironolactone*§ (7e-3, 4101)  Sulfacetamide*§ (4e-3, 4107)  Sulindac*§ (6e-4, 4126)  Tacrine*§ (7e-3, 4100)  Tolazamide*§ (4e-3, 4107)  Tolbutamide*§ (2e-6, 4170) |
| Predicted FDA drugs for target disease | Fulvestrant*§ (1e-3, 133) | Etoposide*§ (7e-3, 41)  Prednisone* (5e-12, 67) | Diethylstilbestrol*§ (7e-3, 4101) |
| Predictions with other supporting evidence | [Amiloride*](http://www.ncbi.nlm.nih.gov/pubmed/10824746) (1e-3, 134)  [Dizocilpine](http://www.springerlink.com/content/4316j55q05086706/)§ (6e-4, 136)  [Estradiol* (Ph 3)](http://clinicaltrials.gov/ct2/show/NCT00193726?term=ESTRADIOL&cond=breast+cancer&rank=15) (1e-3, 133)  [Irinotecan* (Ph 2)](http://clinicaltrials.gov/ct2/show/NCT00003351?term=IRINOTECAN&cond=breast+cancer&rank=6)§ (3e-4, 138)  [Metergoline](http://www.springerlink.com/content/w76t077740163737/) (1e-3, 133)  [Nocodaole](http://www.jci.org/articles/view/13275/version/1) (3e-3, 130)  [Sirolimus* (Ph 2)](http://clinicaltrials.gov/ct2/show/NCT00411788?term=SIROLIMUS&cond=breast+cancer&rank=1)§ (9e-3, 127)  [Thioridazine*](http://jpet.aspetjournals.org/content/263/1/186.abstract) (1e-3, 132)  [Valproic acid*(Ph 2)](http://clinicaltrials.gov/ct2/show/NCT01010854?term=VALPROIC+ACID&cond=breast+cancer&rank=2)§ (4e-10, 163) | [Alvespimycin(Ph 1)](http://clinicaltrials.gov/ct2/show/NCT01126502?term=ALVESPIMYCIN&cond=leukemia&phase=0123&rank=1) (2e-4, 47)  [Ascorbic acid(Ph 2)](http://clinicaltrials.gov/ct2/show/NCT00184054?term=ASCORBIC&cond=leukemia&rank=1) (3e-9, 61)  [Disulfiram*](http://www.ncbi.nlm.nih.gov/pubmed/17026967)§ (1e-5, 51)  [Estradiol*](http://www.jbc.org/content/277/47/44772.abstract)§ (4e-11, 65)  [Etodolac*(Ph 2)](http://clinicaltrials.gov/ct2/show/NCT00151736?term=ETODOLAC&cond=leukemia&phase=0123&rank=1) (3e-4, 46)  [Nabumetone*](http://www.ncbi.nlm.nih.gov/pubmed/16019514) (7e-4, 45)  [Tanespimycin(Ph 1)](http://clinicaltrials.gov/ct2/show/NCT00100997?term=TANESPIMYCIN&cond=leukemia&phase=0123&rank=3) (7e-4, 45)  [Thalidomide*(Ph 2)](http://clinicaltrials.gov/ct2/show/NCT00006226?term=THALIDOMIDE&cond=leukemia&phase=0123&rank=2) (2e-4, 47) | [Alprostadil*(Ph2)](http://clinicaltrials.gov/ct2/show/NCT00080808?term=ALPROSTADIL&cond=prostate+cancer&rank=2) § (5e-3, 4104)  [Chenodeoxycholic acid*](http://www.ncbi.nlm.nih.gov/pubmed/12969788)§  (2e-3, 4113)  [Danazol*](http://www3.interscience.wiley.com/journal/112723117/abstract)§ (1e-4, 4138)  [Deferoxamine*](http://www.informaworld.com/smpp/content~db=all~content=a790502556)§ (1e-3, 4116)  [Desipramine](http://www.ncbi.nlm.nih.gov/pubmed/18606486)§ (4e-5, 4152)  [Disulfiram*](http://webcache.googleusercontent.com/search?q=cache:NF7tcE11YBcJ:www.asco.org/ASCOv2/Meetings/Abstracts%3F%26vmview%3Dabst_detail_view%26confID%3D64%26abstractID%3D20452+"DISULFIRAM+"+"prostate+cancer"&cd=1&hl=ja&ct=clnk&gl=jp&client=firefox-a)§ (6e-3, 4102 )  [Fluvastatin*](http://mct.aacrjournals.org/content/5/9/2310.long)§ (2e-4, 4134)  [Hydrocortisone*(Ph 3)](http://clinicaltrials.gov/ct2/show/NCT00002881?term=HYDROCORTISONE&cond=prostate+cancer&rank=3)§ (6e-5, 4146)  [Mycophenolic acid*](http://www.ncbi.nlm.nih.gov/pubmed/16356827)§ (1e-3, 4119)  [Paclitaxel*(Ph 3)](http://clinicaltrials.gov/ct2/show/NCT00004054?term=PACLITAXEL&cond=prostate+cancer&rank=19)§ (1e-4, 4142)  [Sirolimus*(Ph 2)](http://clinicaltrials.gov/ct2/show/NCT00922129?term=SIROLIMUS&cond=prostate+cancer&rank=1)§ (1e-4, 4142)  [Sulindac*](http://www.ncbi.nlm.nih.gov/pubmed/9933075)§ (6e-4, 4126)  [Tanespimycin(Ph 2)](http://clinicaltrials.gov/ct2/show/NCT00118092?term=TANESPIMYCIN&cond=prostate+cancer&rank=2)§ (5e-3, 4104) |
| Predictions for which trials failed | [Amoxicillin*](http://www.patientsville.com/medication/amoxicillin_side_effects.htm) (2e-3, 131)  [Promethazine*](http://www.ncbi.nlm.nih.gov/pubmed/8746124) (3e-3, 130) | [Tranexamid acid*](http://www3.interscience.wiley.com/journal/122355552/abstract)§ (3e-7, 56) | [Nifedipine*](http://www.ncbi.nlm.nih.gov/pubmed/15728367)§ (2e-3, 4114) |
| New predictions | Adenosine phosphate (4e-3, 129)  Benperidol§ (3e-6, 148)  Benserazide (4e-4, 137)  Chlortetracycline*§ (3e-3, 130)  Desoxycortone§ (1e-4, 140)  Dexibuprofen (6e-4, 136)  Domperidone* (1e-3, 134)  Galantamine (2e-3, 131)  Nilutamide*§ (1e-5, 145)  Pirinixic acid (6e-3, 128)  Propranolol* (3e-3, 130)  Rolitetracycline (9e-3, 127)  Tiletamine (1e-3, 133)  Troleandomycin* (6e-3, 128)  Xylazine (6e-3, 128)  Zaprinast (1e-3, 134) | Acemetacin (1e-3, 44)  Acenocoumarol (1e-5, 51)  Alfuzosin* (2e-3, 43)  Alprostadil* (1e-3, 44)  Amikacin* (3e-9, 61)  Astemizole (3e-6, 53)  Atropine methonitrate (1e-4, 48)  Atropine oxide§ (2e-12, 68)  Benzocaine (7e-3, 41)  Brinzolamide*§ (3e-7, 56)  Chloroquine* (7e-3, 41)  Chlorphenamine*§ (6e-9, 60)  Chlorpromazine* (4e-3, 42)  Ciprofloxacin* (4e-3, 42)  Clenbuterol§ (2e-5, 50)  Clorgiline (1e-12, 69)  Colforsin§ (2e-3, 43)  Cotinine (2e-5, 50)  Dehydrocholic acid (7e-3, 41)  Desipramine (1e-3, 44)  Diazoxide* (7e-4, 45)  Dihydroergotamine* (2e-3, 43)  Dinoprost (4e-3, 42)  Diperodon§ (2e-4, 47)  Dosulepin (2e-4, 47)  Doxylamine (2e-3, 43)  Enoxacin* (2e-4, 47)  Furosemide* (2e-5, 50)  Glafenine (2e-3, 43)  Glipizide* (2e-4, 47)  Haloperidol* (2e-3, 43)  Hycanthone (5e-5, 49)  Isoconazole (3e-6, 53)  Isoniazid* (3e-6, 53)  Ivermectin* (5e-5, 49)  Loxapine* (3e-6, 53)  Mafenide§ (2e-16, 71)  Mefloquine*§ (3e-7, 56)  Mepacrine§ (2e-5, 50)  Mepenzolate bromide* (7e-3, 41)  Metergoline (7e-3, 41)  Methylergometrine*§ (7e-3, 41)  Metitepine (2e-4, 47)  Metrizamide* (1e-3, 44)  Miconazole* (1e-4, 48)  Minocycline* (1e-4, 48)  Minoxidil* (4e-3, 42)  Molsidomine (1e-3, 44)  Mometasone* (1e-6, 54)  Naltrexone* (3e-4, 46)  Nicardipine* (6e-7, 55)  Nicergoline (7e-3, 41)  Nomifensine§ (4e-3, 42)  Norfloxacin* (3e-6, 53)  Orciprenaline* (1e-3, 44)  Oxolinic acid§ (2e-4, 47)  Oxybuprocaine* (6e-6, 52)  Oxybutynin* (7e-3, 41)  Pentetrazol (2e-4, 47)  Pergolide* (1e-3, 44)  Perphenazine* (3e-4, 46)  Phenindione* (7e-4, 45)  Pindolol* (4e-3, 42)  Puromycin (7e-4, 45)  Pyrantel§ (6e-6, 52)  Pyridoxine* (1e-3, 44)  Pyrithyldione (4e-3, 42)  Quinpirole (3e-4, 46)  Streptomycin* (1e-6, 54)  Sulfadiazine* (1e-4, 48)  Sulpiride (2e-3, 43)  Tamoxifen* (3e-9, 61)  Thioproperazine (7e-4, 45)  Thioridazine*§ (7e-3, 41)  Ticlopidine* (5e-5, 49)  Triflusal (5e-5, 49)  Yohimbic acid (1e-3, 44)  Zaprinast§ (1e-5, 51) | Adiphenine§ (2e-4, 4133)  Alprenolol§ (4e-3, 4105)  Alverine (9e-3, 4097)  Amiprilose§ (8e-3, 4099)  Articaine§ (2e-3, 4113)  Azapropazone§ (4e-3, 4105)  Beclometasone*§ (4e-3)  Benzathine benzylpenicillin§ (2e-3, 4111)  Biotin§ (1e-3, 4120)  Brompheniramine*§ (1e-4, 4141)  Cefalotin*§ (5e-3, 4104)  Chlormezanone*§ (6e-3, 4102)  Chlortalidone*§ (2e-4, 4132)  Clorsulon§ (1e-3, 4116)  Dapsone*§ (2e-3, 4111)  Debrisoquine§ (3e-3, 4110)  Dihydroergotamine*§ (7e-3, 4101)  Dioxybenzone§ (8e-3, 4098)  Disopyramide*§ (7e-3, 4101)  Dizocilpine§ (8e-3, 4098)  Domperidone§ (6e-5, 4149)  Ethaverine§ (8e-3, 4098)  Ethionamide*§ (2e-3, 4113)  Flecainide*§ (2e-3, 4114)  Guanabenz*§ (1e-3, 4117)  Guanadrel*§ (9e-3, 4097)  Homochlorcyclizine§ (2e-3, 4115)  Iohexol§ (1e-3, 4117)  Isoniazid*§ (2e-3, 4111)  Isoxicam§ (3e-3, 4109)  Levocabastine*§ (3e-3, 4109)  Lidocaine*§ (1e-4, 4137)  Lynestrenol§ (1e-4, 4137)  Mafenide§ (3e-3, 4109)  Mefexamide§ (2e-3, 4115)  Memantine*§ (4e-3, 4105)  Metampicillin§ (9e-3, 4097)  Metergoline§ (1e-4, 4137)  Metixene*§ (8e-3, 4099)  Mianserin§ (8e-3, 4099)  Mometasone*§ (4e-3, 4105)  Moxonidine§ (1e-4, 4138)  Naftifine* (7e-4, 4124)  Nicergoline§ (1e-3, 4118)  Niclosamide§ (8e-4, 4123)  Nicotinic acid*§ (2e-4, 4132)  Ondansetron*§ (4e-3, 4107)  Orphenadrine*§ (5e-3, 4104)  Oxantel§ (2e-3, 4114)  Oxyphenbutazone*§ (5e-3, 4104)  Pergolide*§ (8e-3, 4099)  Perphenazine*§ (8e-4, 4123)  Pimozide*§ (3e-3, 4108)  Propoxycaine§ (8e-3, 4099)  Pyrithyldione§ (5e-4, 4127)  Ribavirin*§ (4e-3, 4107)  Sisomicin§ (1e-3, 4117)  Spiperone§ (3e-3)  Spiramycin§ (6e-4, 4125)  Spironolactone*§ (7e-3, 4101)  Sulfacetamide*§ (4e-3, 4107)  Tacrine*§ (7e-3, 4100)  Terguride§ (6e-5, 4147)  Thioproperazine§ (9e-3, 4097)  Tolazamide*§ (4e-3, 4107)  Tolbutamide*§ (2e-6, 4170)  Triflupromazine§ (2e-3, 4111)  Urapidil§ (7e-3, 4100) |
| Results of DC/UB | | | |
| Predictions that are FDA drugs for other disease | Amikacin* (1e-4, 179)  Amiodarone* (6e-4, 174)  Azacitidine* (9e-3, 163)  Betazole* (3e-3, 167)  Bupropion* (7e-3, 164)  Cetirizine* (7e-5, 181)  Chlorpropamide* (2e-3, 169)  Chlortetracycline*§ (9e-3, 163)  Chlorzoxazone* (2e-3, 169)  Clozapine* (7e-5, 164)  Dexamethasone* (9e-3, 163)  Dinoprostone* (6e-3, 165)  Dydrogesterone* (8e-4, 173)  Etoposide* (1e-3, 171)  Etynodiol* (8e-4, 173)  Felodipine* (7e-3, 164)  Fluoxetine* (9e-3, 163)  Gabapentin* (6e-3, 165)  Gentamicin* (6e-3, 165)  Guaifenesin* (7e-3, 164)  Guanadrel* (6e-3, 165)  Irinotecan*§ (2e-6, 191)  Methotrexate* (9e-3, 163)  Mycophenolic acid* (1e-5, 185)  Nicardipine* (2e-3, 169)  Nilutamide*§ (1e-3, 171)  Nimodipine* (7e-3, 164)  Novobiocin* (2e-3, 168)  Phenoxybenzamine* (1e-4, 179)  Primaquine* (6e-3, 165)  Prochlorperazine* (1e-3, 171)  Sirolimus*§ (1e-4, 179)  Testosterone* (4e-4, 175)  Topiramate* (7e-3, 164)  Trifluoperazine* (1e-3, 171)  Troglitazone* (6e-3, 165)  Tubocurarine chloride* (1e-5, 186)  Valproic acid*§ (5e-5, 182) | Brinzolamide* (1e-3, 56)  Bromocriptine*§ (3e-3, 54)  Chlorphenamine*§ (4e-4, 58)  Diflunisal* (6e-3, 53)  Disulfiram*§ (9e-3, 52)  Estradiol*§ (4e-4, 59)  Mefloquine*§ (7e-5, 62)  Methylergometrine*§ (9e-3, 52)  Neomycin* (3e-3, 54)  Thioridazine*§ (2e-4, 60)  Tranexamic acid*§ (4e-4, 58) | Alprostadil*§ (5e-3, 2306)  Beclometasone*§ (4e-3, 2310)  Brompheniramine*§ (1e-4, 2342)  Cefalotin*§ (4e-3, 2310)  Chenodeoxycholic acid*§ (3e-3, 2311)  Chlormezanone*§ (4e-3, 2310)  Chlortalidone*§ (1e-4, 2339)  Ciclosporin* (8e-3, 2301)  Danazol* (1e-4, 2338)  Dapsone* (1e-3, 2318)  Deferoxamine*§ (1e-3, 2320)  Demeclocycline* (9e-3, 2299)  Dihydroergotamine*§ (8e-3, 2301)  Disopyramide*§ (5e-3, 2306)  Disulfiram*§ (5e-3, 2306)  Ethionamide*§ (1e-3, 2320)  Flecainide*§ (2e-3, 2315)  Fluvastatin*§ (1e-4, 2338)  Guanabenz*§ (1e-3, 2318)  Guanadrel* (8e-3, 2301)  Hydrocortisone*§ (5e-5, 2350)  Isoniazid*§ (3e-3, 2312)  Levocabastine*§ (4e-3, 2309)  Lidocaine*§ (9e-5, 2345)  Memantine*§ (3e-3, 2312)  Metixene*§ (7e-3, 2302)  Mometasone*§ (8e-3, 2301)  Mycophenolic acid*§ (6e-4, 2328)  Naftifine*§ (7e-4, 2327)  Netilmicin* (9e-3, 2300)  Nicotinic acid*§ (3e-4, 2334)  Nifedipine*§ (2e-3, 2316)  Ondansetron*§ (4e-3, 2308)  Orphenadrine*§ (7e-3, 2302)  Oxyphenbutazone*§ (4e-3, 2310)  Paclitaxel*§ (6e-5, 2348)  Pergolide*§ (6e-3, 2305)  Perphenazine*§ (7e-4, 2327)  Pimozide*§ (4e-3, 2310)  Ribavirin*§ (4e-3, 2310)  Rifampicin* (8e-3, 2301)  Sirolimus*§ (1e-4, 2343)  Spironolactone* (6e-3, 2305)  Sulfacetamide*§ (4e-3, 2309)  Sulfadiazine* (8e-3, 2301)  Sulindac*§ (5e-4, 2330)  Tacrine*§ (5e-3, 2306)  Tolazamide*§ (3e-3, 2312)  Tolbutamide*§ (1e-6, 2376)  Triamterene* (9e-3, 2300) |
| Predicted FDA drugs for target disease | Fulvestrant*§ (1e-3, 170) | Etoposide*§ (1e-3, 56) | Diethylstilbestrol*§ (6e-3, 2304) |
| Predictions with other supporting evidence | [Artemisinn](http://webcache.googleusercontent.com/search?q=cache:S-7aJ2ZjuF4J:www.cbcrp.org/research/PageGrant.asp%3Fgrant_id%3D4768+"ARTEMISININ+"+"breast+cancer"&cd=4&hl=ja&ct=clnk&gl=jp&client=firefox-a) (1e-3, 171)  [Bupropion*(Ph 4)](http://clinicaltrials.gov/ct2/show/NCT00234195?term=BUPROPION&cond=breast+cancer&rank=1) (7e-3, 164)  [Dexamethasone*(Ph 3)](http://clinicaltrials.gov/ct2/show/NCT00475085?term=DEXAMETHASONE&cond=breast+cancer&rank=2) (9e-3, 163)  [Dizocilpine](http://www.springerlink.com/content/4316j55q05086706/)§ (1e-3, 171)  [Dydrogesterone*](http://ar.iiarjournals.org/content/24/3A/1433.abstract) (8e-4, 173)  [Etoposide*(Ph 2)](http://clinicaltrials.gov/ct2/show/NCT00810017?term=ETOPOSIDE&cond=breast+cancer&rank=1) (1e-4, 171)  [Gabapentin*(Ph 3)](http://clinicaltrials.gov/ct2/show/NCT00087399?term=GABAPENTIN&cond=breast+cancer&rank=4) (6e-3, 165)  [Irinotecan*(Ph 2)](http://clinicaltrials.gov/ct2/show/NCT00003351?term=IRINOTECAN&cond=breast+cancer&rank=6)§ (2e-6, 191)  [Mestranol](http://www.sciencedirect.com/science?_ob=ArticleURL&_udi=B6TC9-4FW1F9K-H&_user=489277&_coverDate=12%2F31%2F1970&_rdoc=1&_fmt=high&_orig=search&_sort=d&_docanchor=&view=c&_searchStrId=1324171716&_rerunOrigin=google&_acct=C000022679&_version=1&_urlVersion=0&_userid=489277&md5=b812fc350d7aa488ec1a1571b2a0008f) (3e-3, 167)  [Methotrexate*(Ph 3)](http://clinicaltrials.gov/ct2/show/NCT00296010?term=METHOTREXATE&cond=breast+cancer&rank=9) (9e-3, 163)  [Nimesulide](http://www.ncbi.nlm.nih.gov/pubmed/19046800) (6e-4, 174)  [Nomegestrol](http://www.ncbi.nlm.nih.gov/pubmed/15767920) (7e-3, 164)  [Novobiocin*](http://www.ncbi.nlm.nih.gov/pubmed/18261372) (2e-3, 168)  [Prochlorperazine*(Ph 3)](http://clinicaltrials.gov/ct2/show/NCT00475085?term=PROCHLORPERAZINE&cond=breast+cancer&rank=1) (1e-3, 170)  [Sirolimus*(Ph 2)](http://clinicaltrials.gov/ct2/show/NCT00411788?term=SIROLIMUS&cond=breast+cancer&rank=1)§ (1e-4, 179)  [Testosterone*(Ph 2)](http://clinicaltrials.gov/ct2/show/NCT00497458?term=TESTOSTERONE&cond=breast+cancer&rank=1) (4e-4, 175)  [Valproic acid* (Ph 2)](http://clinicaltrials.gov/ct2/show/NCT01010854?term=VALPROIC+ACID&cond=breast+cancer&rank=2)§ (5e-5, 182)  [Trifluoperazine*](http://www.ncbi.nlm.nih.gov/pubmed/8349440) (1e-3, 172)  [Troglitazone*](http://www.ncbi.nlm.nih.gov/pubmed/19699029) (6e-3, 165) | [Estradiol*](http://www.jbc.org/content/277/47/44772.abstract)§ (4e-4, 59)  [Disulfiram*](http://www.ncbi.nlm.nih.gov/pubmed/17026967)§ (9e-3, 52)  [Nicrosamide](http://cancerres.aacrjournals.org/cgi/content/full/70/6/2516) (6e-3, 53)  [Nocodazole](http://ar.iiarjournals.org/content/25/5/3321.abstract) (4e-4, 59) | [Alprostadil*(Ph 2)](http://clinicaltrials.gov/ct2/show/NCT00080808?term=ALPROSTADIL&cond=prostate+cancer&rank=2)§ (5e-3, 2306)  [Chenodeoxycholic acid*](http://www.ncbi.nlm.nih.gov/pubmed/12969788)§ (3e-3, 2311)  [Ciclosporin*(Ph 3)](http://clinicaltrials.gov/ct2/show/NCT00922129?term=CICLOSPORIN&cond=Prostate+cancer&rank=1) (8e-3, 2301)  [Danazol*](http://www3.interscience.wiley.com/journal/112723117/abstract)§ (1e-4, 2338)  [Deferoxamine*](http://www.informaworld.com/smpp/content~db=all~content=a790502556)§ (1e-3, 2320)  [Desipramine](http://www.ncbi.nlm.nih.gov/pubmed/18606486)§ (4e-5, 2355)  [Disulfiram*](http://webcache.googleusercontent.com/search?q=cache:NF7tcE11YBcJ:www.asco.org/ASCOv2/Meetings/Abstracts%3F%26vmview%3Dabst_detail_view%26confID%3D64%26abstractID%3D20452+"DISULFIRAM+"+"prostate+cancer"&cd=1&hl=ja&ct=clnk&gl=jp&client=firefox-a)§ (5e-3, 2306)  [Hydrocortisone*(Ph 3)](http://clinicaltrials.gov/ct2/show/NCT00002881?term=HYDROCORTISONE&cond=prostate+cancer&rank=3)§ (5e-5, 2350)  [Mycophenolic acid*](http://www.ncbi.nlm.nih.gov/pubmed/16356827)§ (6e-4, 2328)  [Paclitaxel*(Ph 3)](http://clinicaltrials.gov/ct2/show/NCT00004054?term=PACLITAXEL&cond=prostate+cancer&rank=19)§ (6e-5, 2348)  [Sirolimus*(Ph 2)](http://clinicaltrials.gov/ct2/show/NCT00922129?term=SIROLIMUS&cond=prostate+cancer&rank=1)§ (1e-4, 2343)  [Sulindac*](http://www.ncbi.nlm.nih.gov/pubmed/9933075)§ (5e-4, 2330)  [Tanespimycin(Ph 2)](http://clinicaltrials.gov/ct2/show/NCT00118092?term=TANESPIMYCIN&cond=prostate+cancer&rank=2)§ (5e-3, 2306) |
| Predictions for which trials failed | [Amiodarone*](http://www.ncbi.nlm.nih.gov/pubmed/7882454) (6e-4, 174)  [Fluoxetine*](http://aje.oxfordjournals.org/cgi/content/full/162/9/835) (9e-3, 163)  [Hycanthone](http://www.ncbi.nlm.nih.gov/pubmed/7448830) (9e-3, 163) | [Tranexamic acid*](http://www3.interscience.wiley.com/journal/122355552/abstract)§ (4e-4, 58) | [Nifedipine*](http://www.ncbi.nlm.nih.gov/pubmed/15728367)§ (2e-3, 2316) |
| New predictions | Acenocoumarol (3e-3, 167)  Amikacin* (1e-4, 179)  Azacitidine* (9e-3, 163)  Benperidol§ (2e-3, 168)  Betazole* (3e-3, 167)  Cetirizine* (7e-5, 181)  Chlorpropamide* (2e-3, 169)  Chlortetracycline*§ (9e-3, 163)  Chlorzoxazone* (2e-3, 168)  Clenbuterol (2e-3, 168)  Clozapine* (7e-5, 181)  Debrisoquine (7e-3, 164)  Desoxycortone§ (1e-4, 179)  Dinoprostone* (6e-3, 165)  Dioxybenzone (9e-3, 163)  Domperidone§ (2e-3, 168)  Etynodiol* (8e-4, 173)  Eucatropine (7e-3, 164)  Felodipine* (7e-3, 164)  Gentamicin* (6e-3, 165)  Guaifenesin* (7e-3, 164)  Guanadrel* (6e-3, 165)  Iohexol (9e-3, 163)  Ketanserin (1e-3, 171)  Lorglumide (4e-4, 175)  Mefexamide (2e-3, 168)  Metampicillin (3e-3, 167)  Moroxydine (7e-3, 164)  Mycophenolic acid* (1e-5, 185)  Naphazoline (2e-3, 168)  Nicardipine* (2e-3, 168)  Nifenazone (8e-4, 173)  Nilutamide*§ (1e-3, 171)  Nimodipine* (7e-3, 164)  Phenoxybenzamine* (1e-4, 179)  Primaquine* (6e-3, 165)  Tetroquinone (2e-3, 168)  Topiramate* (7e-3, 164)  Tubocurarine chloride* (1e-5, 186) | Atropine oxide§ (6e-7, 68)  Brinzolamide*§ (1e-3, 56)  Bromocriptine* (3e-3, 54)  Chlorphenamine*§ (4e-4, 58)  Clenbuterol§ (3e-3, 54)  Colforsin§ (9e-3, 52)  Diflunisal* (6e-3, 53)  Diperodon§ (9e-3, 52)  Lanatoside c (4e-4, 58)  Mafenide§ (4e-4, 59)  Mefloquine*§ (7e-5, 62)  Mepacrine§ (5e-7, 69)  Methylergometrine*§ (9e-3, 52)  Neomycin* (3e-3, 54)  Nomifensine§ (2e-3, 55)  Oxolinic acid§ (2e-3, 55)  Pyrantel§ (4e-4, 59)  Suloctidil (6e-3, 53)  Thioridazine*§ (2e-4, 60)  Zaprinast§ (4e-4, 58) | Adiphenine§ (3e-4, 2334)  Alprenolol§ (7e-3, 2303)  Amiprilose§ (6e-3, 2305)  Articaine§ (2e-3, 2314)  Azapropazone§ (4e-3, 2309)  Beclometasone*§ (4e-3, 2310)  Benzathine benzylpenicillin§ (2e-3, 2317)  Biotin§ (7e-4, 2327)  Brompheniramine*§ (1e-4, 2342)  Cefalotin*§ (4e-3, 2310)  Chlormezanone*§ (4e-3, 2310)  Chlortalidone*§ (1e-4, 2339)  Clorsulon§ (1e-3, 2322)  Dapsone*§ (1e-3, 2318)  Debrisoquine§ (2e-3, 2316)  Demeclocycline* (9e-3, 2299)  Dihydroergotamine*§ (8e-3, 2301)  Dioxybenzone§ (6e-3, 2304)  Disopyramide*§ (5e-3, 2306)  Dizocilpine§ (7e-3, 2303)  Domperidone§ (4e-5, 2352)  Ethaverine§ (9e-3, 2300)  Ethionamide*§ (1e-3, 2320)  Flecainide*§ (2e-3, 2315)  Fluvastatin*§ (1e-4, 2338)  Guanabenz*§ (1e-3, 2318)  Guanadrel*§ (8e-3, 2301)  Homochlorcyclizine§ (2e-3, 2317)  Iohexol§ (1e-3, 2320)  Isoniazid*§ (3e-3, 2312)  Isoxicam§ (4e-3, 2310)  Levocabastine*§ (4e-3, 2310)  Lidocaine*§ (9e-5, 2345)  Lynestrenol§ (1e-4, 2341)  Mafenide§ (4e-3, 2310)  Mefexamide§ (1e-3, 2319)  Memantine*§ (3e-3, 2312)  Metampicillin§ (6e-3, 2304)  Metergoline§ (1e-4, 2341)  Metixene*§ (7e-3, 2302)  Mianserin§ (9e-3, 2300)  Mometasone*§ (8e-3, 2301)  Moxonidine§ (1e-4, 2343)  Naftifine*§ (7e-4, 2327)  Netilmicin* (9e-3, 2300)  Nicergoline§ (1e-3, 2319)  Niclosamide§ (5e-4, 2329)  Nicotinic acid*§ (3e-4, 2334)  Ondansetron*§ (4e-3, 2308)  Orphenadrine*§ (7e-3, 2302)  Oxantel§ (2e-3, 2316)  Oxyphenbutazone*§ (4e-3, 2308)  Pergolide* (6e-3, 2305)  Perphenazine*§ (7e-4, 2327)  Pimozide*§ (4e-3, 2308)  Propoxycaine§ (6e-3, 2305)  Pyrithyldione§ (4e-4, 2331)  Ribavirin*§ (4e-3, 2308)  Rifampicin* (8e-3, 2301)  Sisomicin§ (1e-3, 2320)  Spiperone§ (3e-3, 2313)  Spiramycin§ (8e-4, 2325)  Spironolactone*§ (6e-3, 2305)  Sulfacetamide*§ (4e-3, 2309)  Sulfadiazine* (8e-3, 2301)  Tacrine* (5e-3, 2306)  Terguride§ (3e-5, 2354)  Thioproperazine§ (7e-3, 2302)  Tolazamide*§ (3e-3, 2312)  Tolbutamide*(1e-6, 2376)  Triamterene* (9e-3, 2300)  Triflupromazine§ (2e-3, 2317)  Urapidil§ (6e-3, 2304) |
| Drugs predicted in both UC/DB and DC/UB | | | |
| Overlap predictions | Benperidol§  Chlortetracycline*§  Desoxycortone§  [Dizocilpine](http://www.springerlink.com/content/4316j55q05086706/)§  Domperidone§  Fulvestrant (in use)§  [Irinotecan*(Ph 2)](http://clinicaltrials.gov/ct2/show/NCT00003351?term=IRINOTECAN&cond=breast+cancer&rank=6)§  Nilutamide*§  [Sirolimus*(Ph 2)](http://clinicaltrials.gov/ct2/show/NCT00411788?term=SIROLIMUS&cond=breast+cancer&rank=1)§  [Valproic acid*(Ph 2)](http://clinicaltrials.gov/ct2/show/NCT01010854?term=VALPROIC+ACID&cond=breast+cancer&rank=2)§ | Atropine oxide§  Brinzolamide*§  Chlorphenamine*§  Clenbuterol§  Colforsin§  Diperodon§  [Disulfiram*](http://www.ncbi.nlm.nih.gov/pubmed/17026967)§  [Estradiol*](http://www.jbc.org/content/277/47/44772.abstract)§  Etoposide§ (in use)  Mafenide§  Mefloquine*§  Mepacrine§  Methylergometrine*§  Nomifensine§  Oxolinic acid§  Pyrantel§  Thioridazine*§  [Tranexamic acid*](http://www3.interscience.wiley.com/journal/122355552/abstract)§  Zaprinast§ | Adiphenine§  Alprenolol§  [Alprostadil*(Ph2)](http://clinicaltrials.gov/ct2/show/NCT00080808?term=ALPROSTADIL&cond=prostate+cancer&rank=2) §  Amiprilose§  Articaine§  Azapropazone§  Beclometasone*§  Benzathine§ benzylpenicillin§  Biotin§  Brompheniramine*§  Cefalotin*§  [Chenodeoxycholic acid*](http://www.ncbi.nlm.nih.gov/pubmed/12969788)§  Chlormezanone*§  Chlortalidone*§  Clorsulon§  [Danazol*](http://www3.interscience.wiley.com/journal/112723117/abstract)§  Dapsone*§  Debrisoquine§  [Deferoxamine*](http://www.informaworld.com/smpp/content~db=all~content=a790502556)§  [Desipramine](http://www.ncbi.nlm.nih.gov/pubmed/18606486)§  Diethylstilbestrol§(in use)  Dihydroergotamine*§  Dioxybenzone§  Disopyramide*§  [Disulfiram*](http://webcache.googleusercontent.com/search?q=cache:NF7tcE11YBcJ:www.asco.org/ASCOv2/Meetings/Abstracts%3F%26vmview%3Dabst_detail_view%26confID%3D64%26abstractID%3D20452+"DISULFIRAM+"+"prostate+cancer"&cd=1&hl=ja&ct=clnk&gl=jp&client=firefox-a)§  Dizocilpine§  Domperidone§  Ethaverine§  Ethionamide*§  Flecainide*§  [Fluvastatin*](http://mct.aacrjournals.org/content/5/9/2310.long)§  Guanabenz*§  Guanadrel*§  Homochlorcyclizine§  [Hydrocortisone*(Ph 3)](http://clinicaltrials.gov/ct2/show/NCT00002881?term=HYDROCORTISONE&cond=prostate+cancer&rank=3)§  Iohexol§  Isoniazid*§  Isoxicam§  Levocabastine*§  Lidocaine*§  Lynestrenol§  Mafenide§  Mefexamide§  Memantine*§  Metampicillin§  Metergoline§  Metixene*§  Mianserin§  Mometasone*§  Moxonidine§  [Mycophenolic acid*](http://www.ncbi.nlm.nih.gov/pubmed/16356827)§  Naftifine*§  Nicergoline§  Niclosamide§  Nicotinic acid*§  [Nifedipine*](http://www.ncbi.nlm.nih.gov/pubmed/15728367)§  Ondansetron*§  Orphenadrine*§  Oxantel§  Oxyphenbutazone*§  [Paclitaxel* (Ph 3)](http://clinicaltrials.gov/ct2/show/NCT00004054?term=PACLITAXEL&cond=prostate+cancer&rank=19) §  Pergolide*§  Perphenazine*§  Pimozide*§  Propoxycaine§  Pyrithyldione§  Ribavirin*§  [Sirolimus* (Ph 2)](http://clinicaltrials.gov/ct2/show/NCT00922129?term=SIROLIMUS&cond=prostate+cancer&rank=1) §  Sisomicin§  Spiperone§  Spiramycin§  Spironolactone*§  Sulfacetamide*§  [Sulindac*](http://www.ncbi.nlm.nih.gov/pubmed/9933075)§  Tacrine*§  [Tanespimycin(Ph 2)](http://clinicaltrials.gov/ct2/show/NCT00118092?term=TANESPIMYCIN&cond=prostate+cancer&rank=2) §  Terguride§  Thioproperazine§  Tolazamide*§  Tolbutamide*§  Triflupromazine§  Urapidil§ |
| Total | 10 | 19 | 82 |
